# Supplementary material for: Antibiotic Resistance of Salmonella Typhimurium Monophasic Variant 1,4,[5],12:i:-in China: A Systematic Review and Meta-Analysis
Source: MDPI journal article supplement (doi:10.3390/antibiotics11040532), 2022-04-16
Supplement: s1 [file s1]

Table S1. List and characteristics of the 19 eligible studies

| References | Language | Year of isolates | Simple sizes | Source                            | Susceptibility test method        |
|------------|----------|------------------|--------------|-----------------------------------|-----------------------------------|
| [62]       | Chinese  | 2017-2019        | 68           | Clinical patients                 | Broth micro dilution method       |
| [63]       | Chinese  | 2008-2019        | 92           | Clinical patients                 | Broth micro dilution method       |
| [64]       | Chinese  | 2018             | 124          | Foods and clinical patients       | Broth micro dilution method       |
| [35]       | English  | 2014-2018        | 76           | Clinical patients                 | VITEK 2 system                    |
| [36]       | English  | 2014-2017        | 231          | Clinical patients                 | Agar dilution method              |
| [13]       | English  | 2018-2019        | 28           | Animals                           | Kirby–Bauer disk diffusion method |
| [65]       | Chinese  | 2016-2017        | 226          | Clinical patients                 | Broth micro dilution method       |
| [66]       | Chinese  | 2017-2019        | 143          | Clinical patients                 | Broth micro dilution method       |
| [48]       | English  | 2010-2018        | 255          | Clinical patients and animals     | Broth micro dilution method       |
| [16]       | English  | 2011-2016        | 15           | Foods                             | Kirby–Bauer disk diffusion method |
| [67]       | Chinese  | 2013-2015        | 52           | Clinical patients                 | Kirby–Bauer disk diffusion method |
| [34]       | English  | 2014-2016        | 56           | Animals                           | Broth micro dilution method       |
| [68]       | Chinese  | 2007-2016        | 2960         | Clinical patients                 | Kirby–Bauer disk diffusion method |
| [40]       | English  | 2009-2014        | 16           | Clinical patients                 | Agar dilution method              |
| [30]       | English  | 2010-2014        | 13           | Clinical patients                 | Kirby-Bauer disk diffusion method |
| [69]       | English  | 2007-2012        | 13           | Animals, foods, clinical patients | VITEK 32 GNS-143 card             |
| [58]       | English  | 2011-2014        | 13           | Foods                             | Kirby-Bauer disk diffusion method |
| [70]       | English  | 2009-2012        | 254          | Clinical patients                 | Kirby-Bauer disk diffusion method |
| [71]       | English  | 2007-2012        | 1764         | Clinical patients                 | Agar dilution method              |
